# Supplementary material for: Recognition of ROS-elicited Z-nucleic acids by Z-DNA binding protein 1 is required for acetaminophen-induced liver injury
Source: Research Square preprint supplement (doi:10.21203/rs.3.rs-6395495/v1), 2025-06-10

# Supplementary materials of “Recognition of ROS-elicited Z-nucleic acids by Z-DNA binding protein 1 is required for acetaminophen-induced liver injury”

## Supplementary figure1 | Gel source data

Thermo Scientific™ PageRuler™#26616 was used as molecular weight markers.

Illustration given on the manufacturer's website:

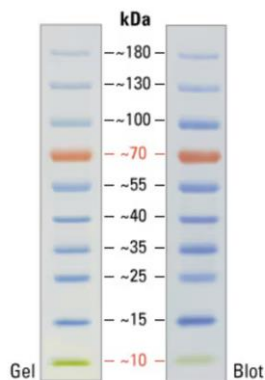

Examples of molecular weights obtained in our experiments:

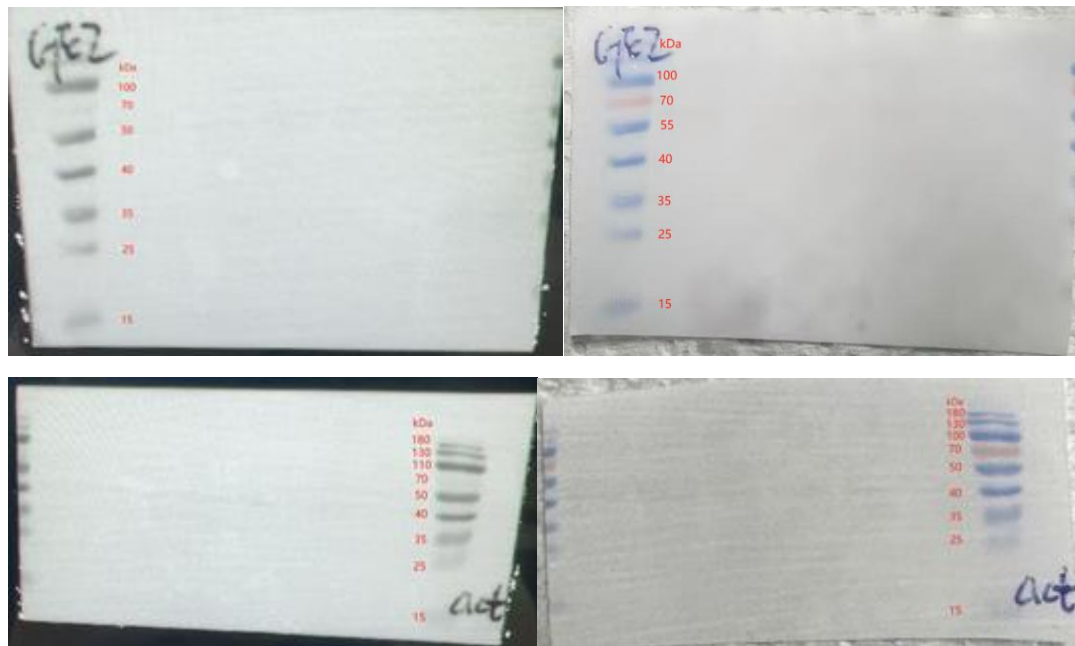

Red box indicated how the gels were cropped for the final figure.

**Figure 2 a**

MLKL:

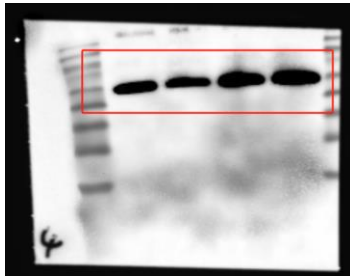

p-MLKL:

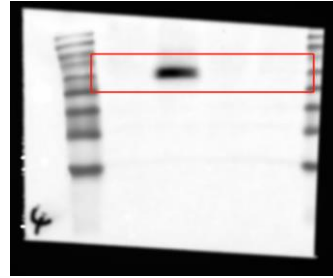

Casp8:

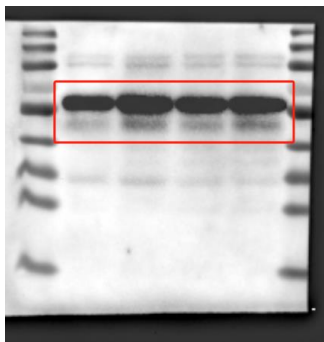

cleaved-Casp8:

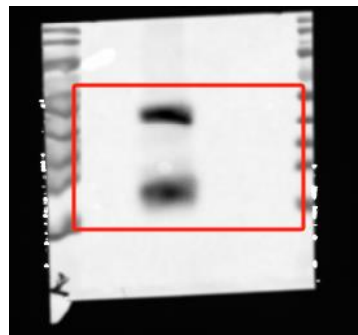

Casp3:

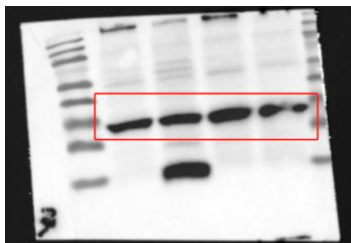

cleaved-Casp3:

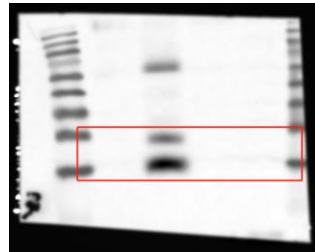

ZBP1:

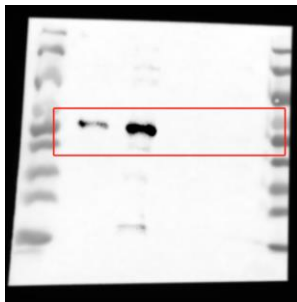

pro-GSDME and cleaved-GSDME :

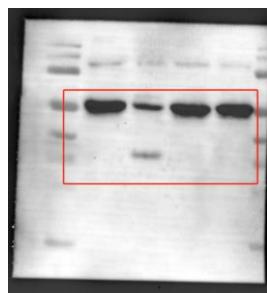

pro-GSDMD and cleaved-GSDMD

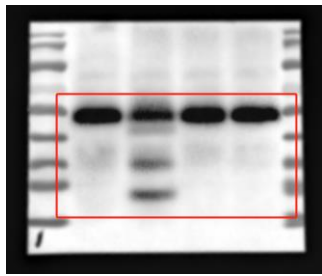

$\beta$ -actin(run on the same gel with GSDME as loading controls)

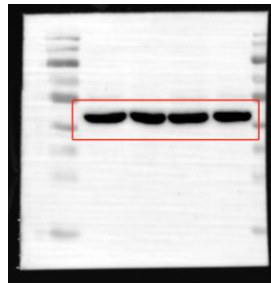

**Figure 4 b**

Casp8:

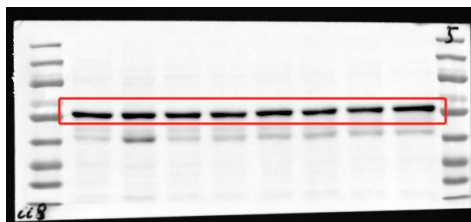

cleaved-Casp8:

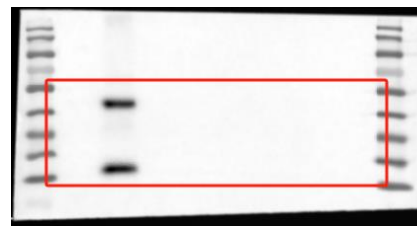

Casp3:

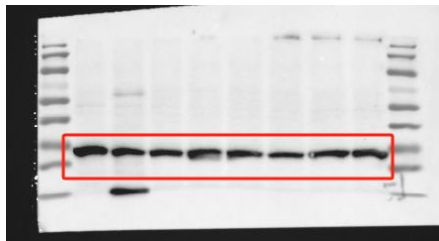

cleaved-Casp3:

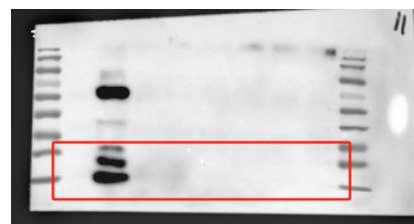

ZBP1:

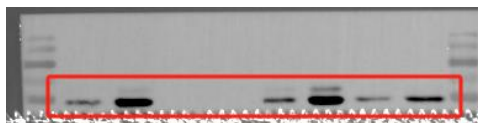

pro-GSDME and cleaved-GSDME :

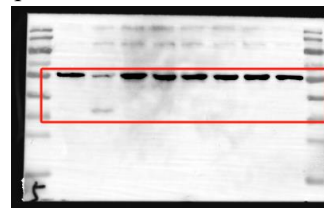

pro-GSDMD and cleaved-GSDMD

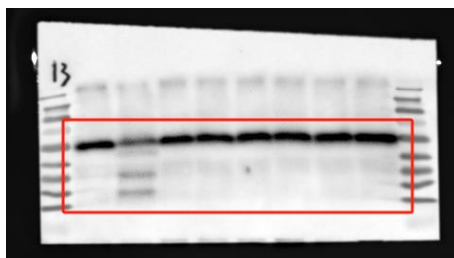

$\beta$ -actin(run on the same gel with GSDME as loading controls)

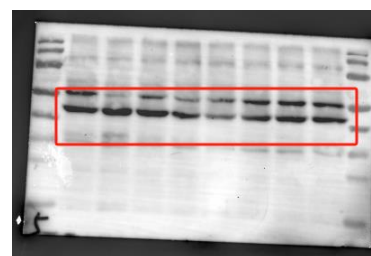

**Figure 4 d**

Casp8:

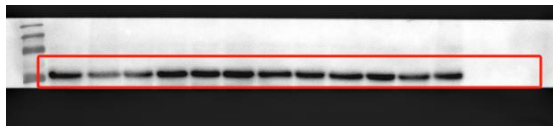

cleaved-Casp8:

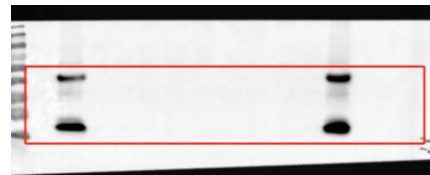

Casp3:

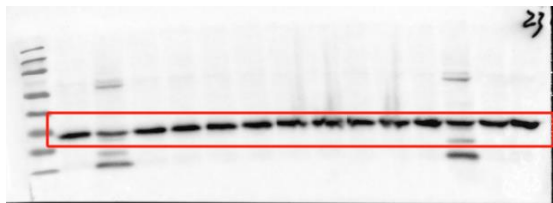

cleaved-Casp3:

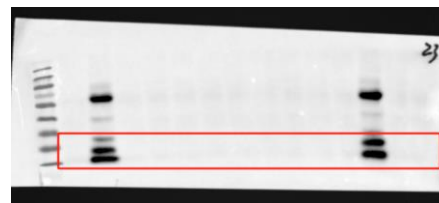

ZBP1:

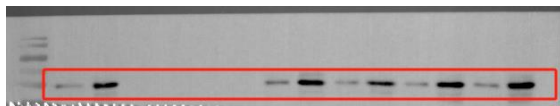

pro-GSDMD and cleaved-GSDMD:

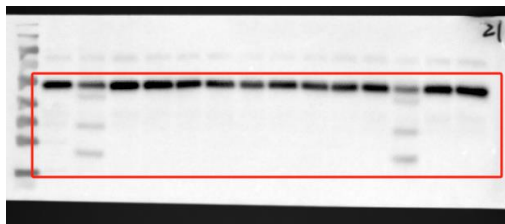

pro-GSDME and cleaved-GSDME :

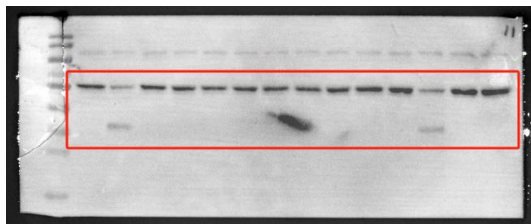

$\beta$ -actin(run on separate gels as sample processing controls):

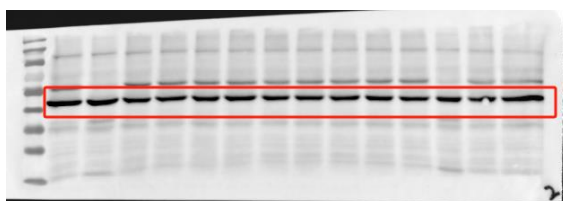

**Figure 4 f**

IP ZBP1:

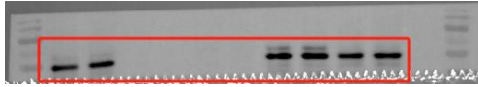

IP FADD:

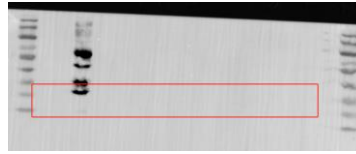

IP RIPK1:

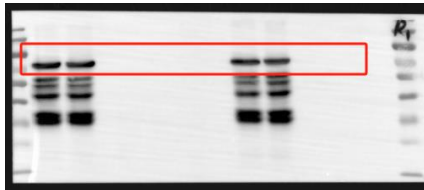

IP Casp8:

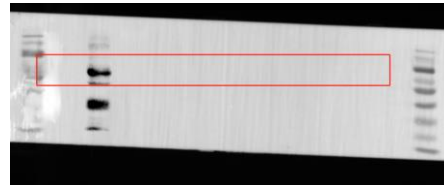

INPUT ZBP1:

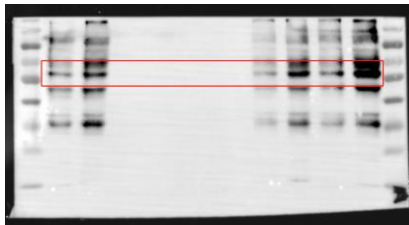

INPUT FADD:

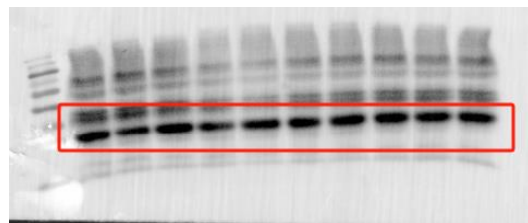

INPUT RIPK1:

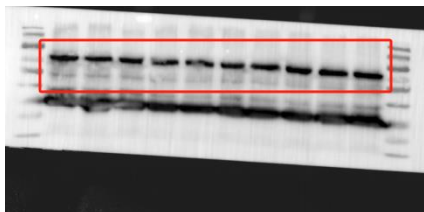

INPUT CASP8:

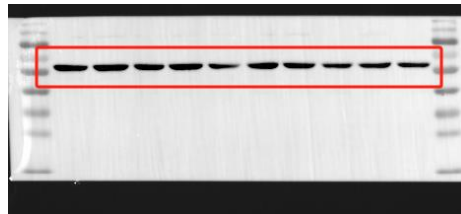

**Figure 5 e**

Casp8:

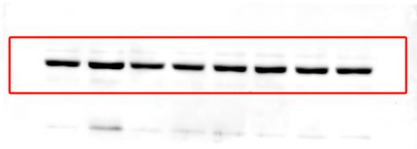

cleaved-Casp8:

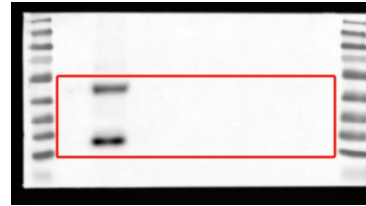

Casp3:

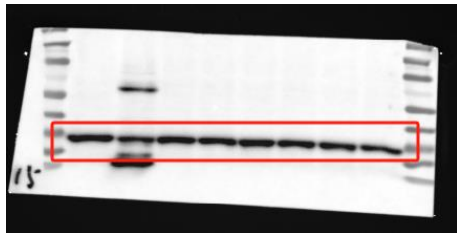

cleaved-Casp3:

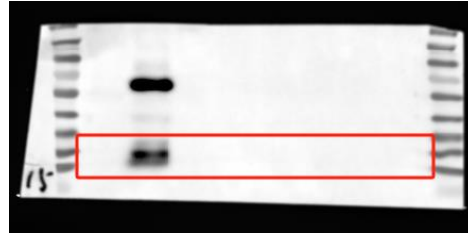

ZBP1:

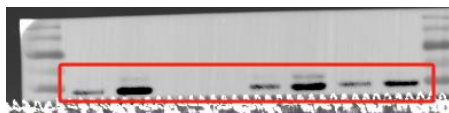

pro-GSDME and cleaved-GSDME :

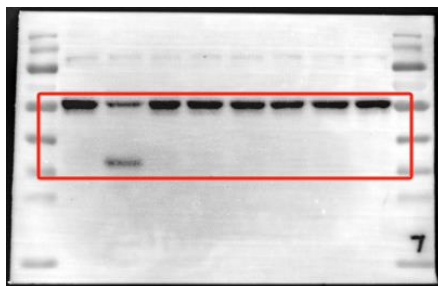

pro-GSDMD and cleaved-GSDMD

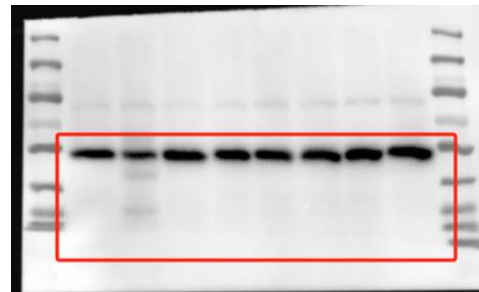

$\beta$ -actin(run on separate gels as sample processing controls):

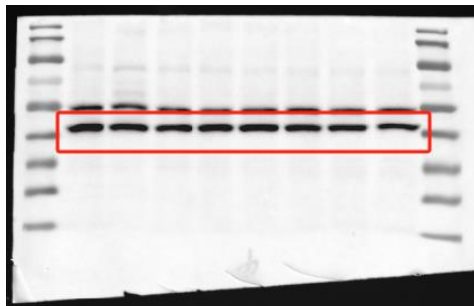

**Figure 6 e**

Casp8:

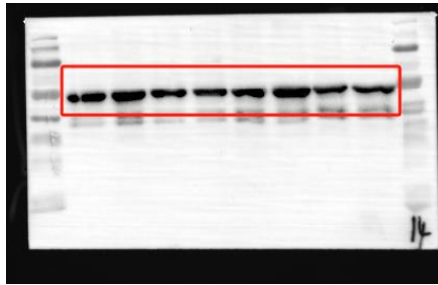

cleaved-Casp8:

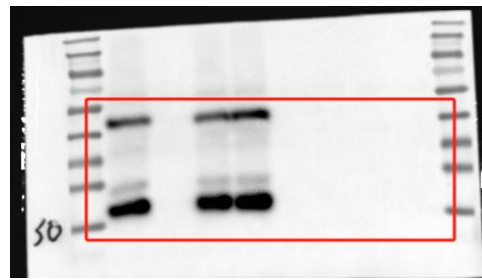

Casp3:

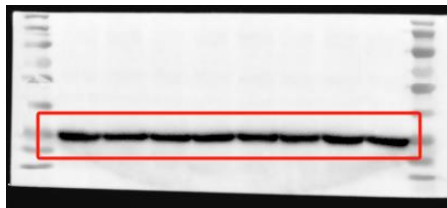

cleaved-Casp3:

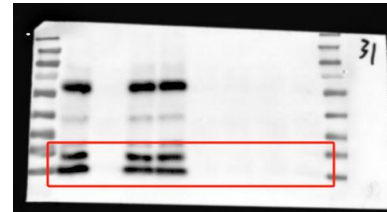

ZBP1:

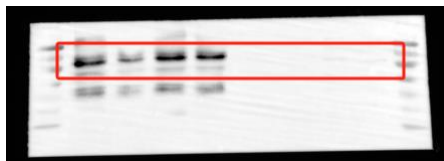

pro-GSDME and cleaved-GSDME :

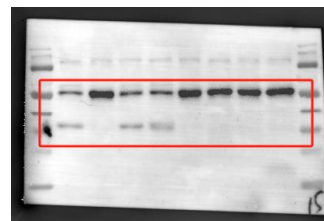

pro-GSDMD and cleaved-GSDMD:

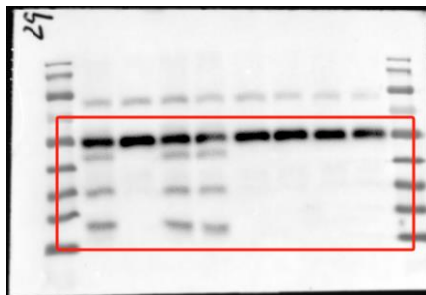

$\beta$ -actin(run on separate gels as sample processing controls):

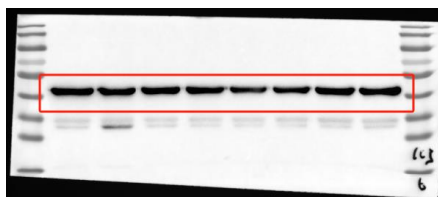

**Figure 6 g**

IP ZBP1:

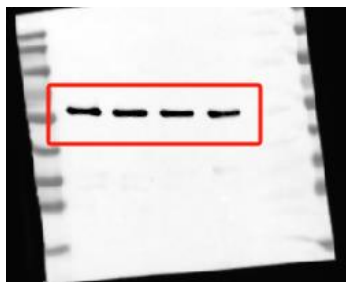

IP FADD:

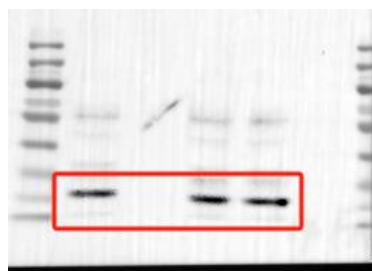

IP RIPK1:

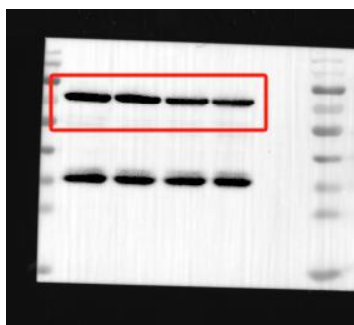

IP Casp8:

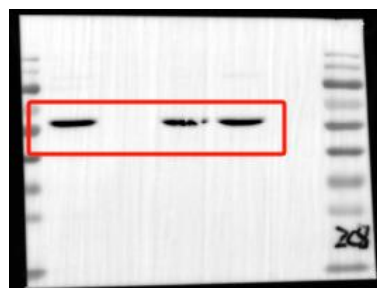

INPUT ZBP1:

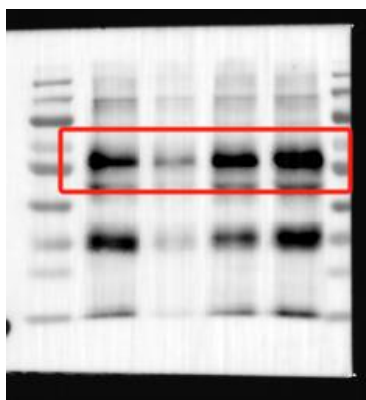

INPUT FADD:

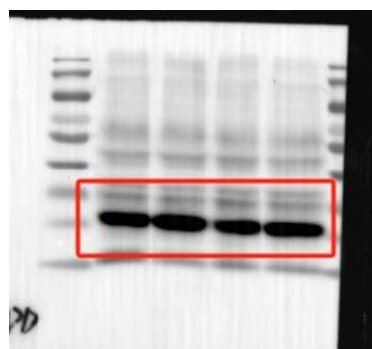

INPUT RIPK1:

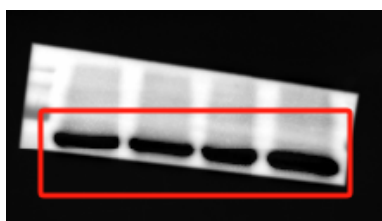

INPUT Casp8:

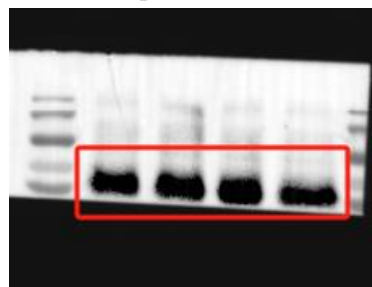

**Figure 6 i**

Casp8:

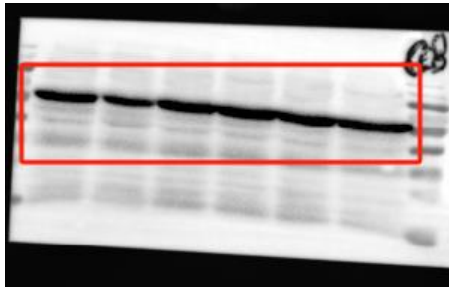

cleaved-Casp8:

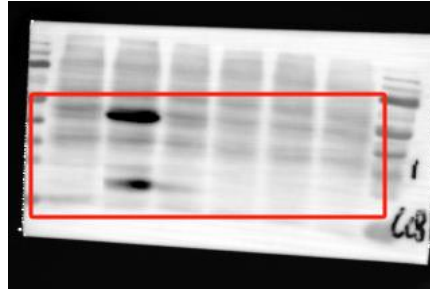

Casp3:

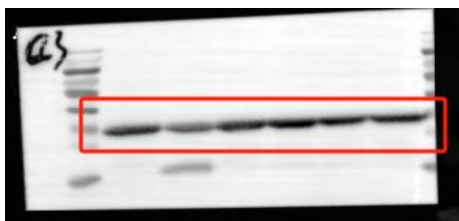

cleaved-Casp3:

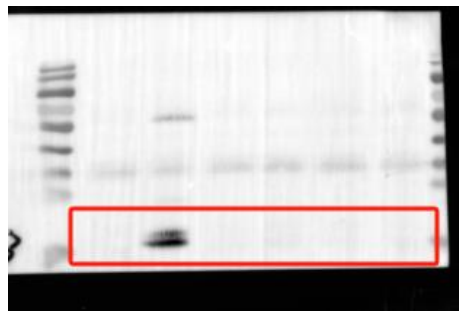

ZBP1:

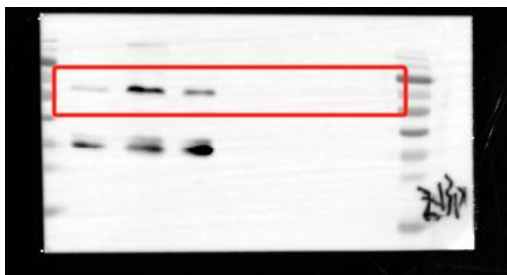

pro-GSDME and cleaved-GSDME:

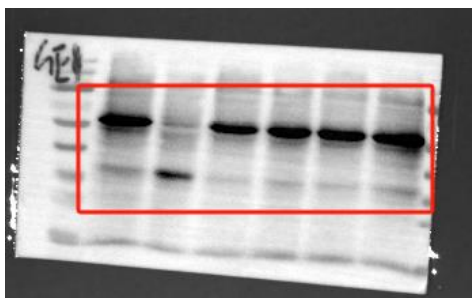

pro-GSDMD and cleaved-GSDMD:

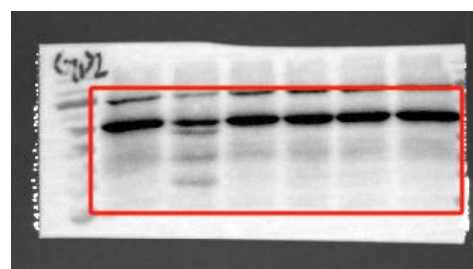

$\beta$ -actin(run on separate gels as sample processing controls)

1:

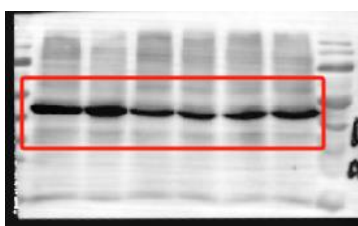

2:

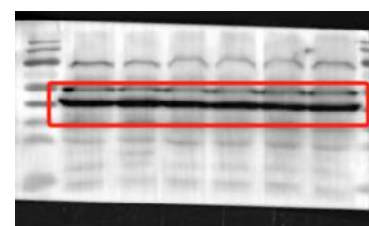

**Extended data | Figure2 g-k**

RIPK3:

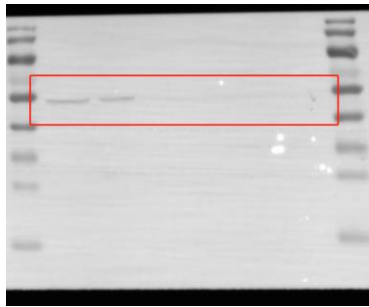

p-RIPK3:

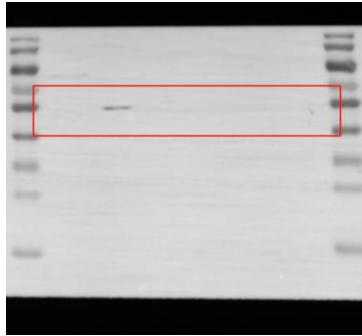

Casp8:

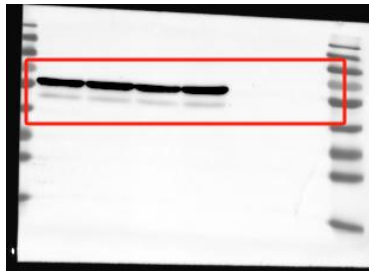

cleaved-Casp8:

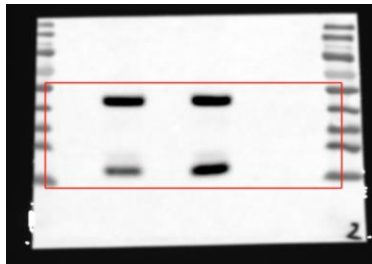

Casp3:

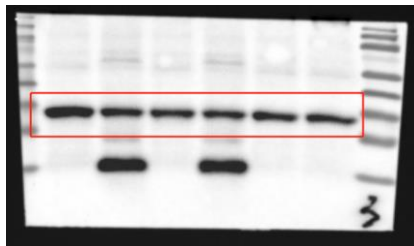

cleaved-Casp3:

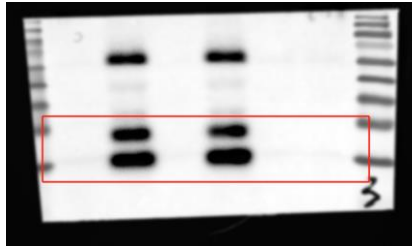

pro-GSDME and cleaved-GSDME:

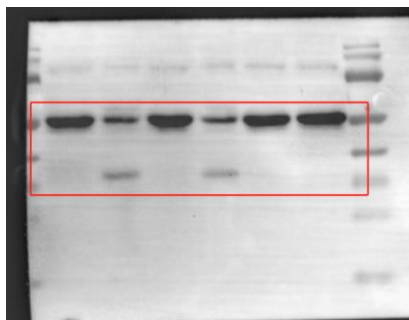

pro-GSDMD and cleaved-GSDMD:

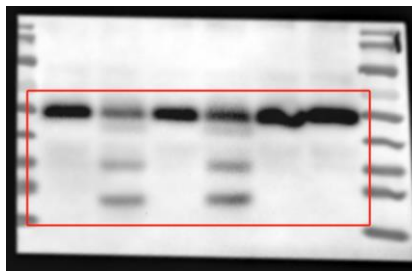

ZBP1:

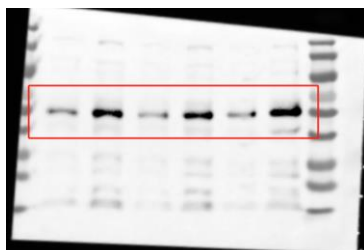

$\beta$ -actin(run on the same gel with GSDME as loading controls):

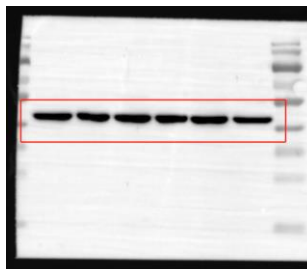

**Extended data | Figure3 a**

Casp8:

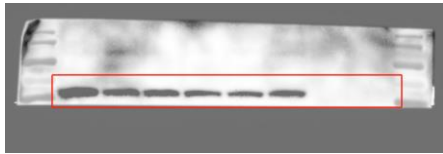

cleaved-Casp8:

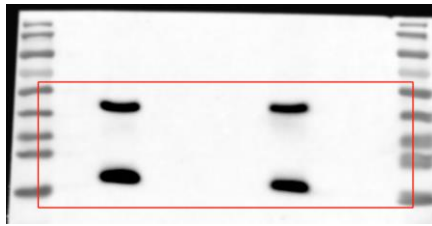

Casp3:

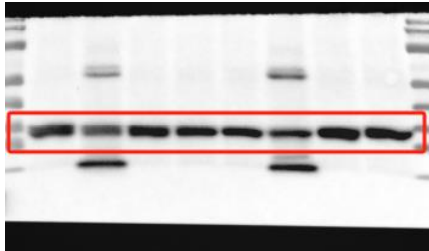

cleaved-Casp3:

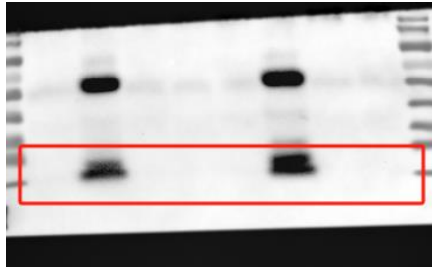

ZBP1:

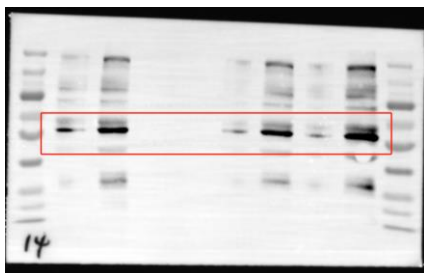

pro-GSDME and cleaved-GSDME:

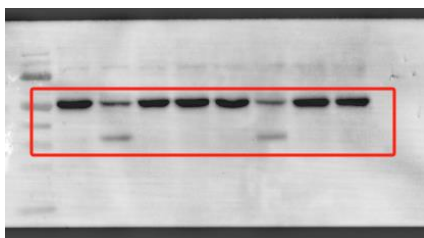

pro-GSDMD and cleaved-GSDMD:

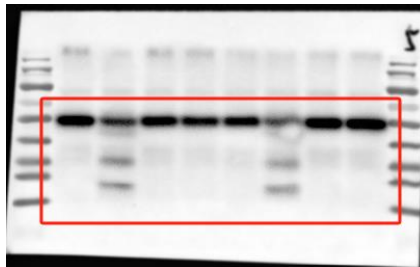

$\beta$ -actin(run on the same gel with GSDME as loading controls):

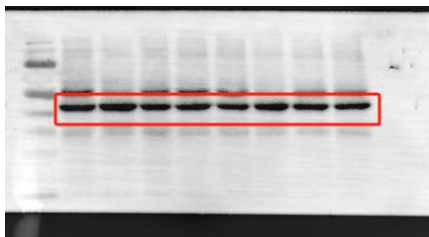

**Extended data | Figure3 b**

Casp8:

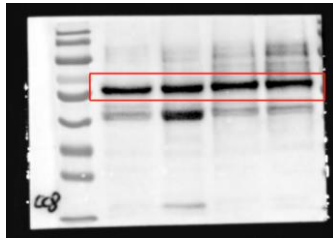

cleaved-Casp8:

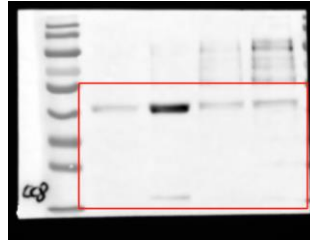

Casp3:

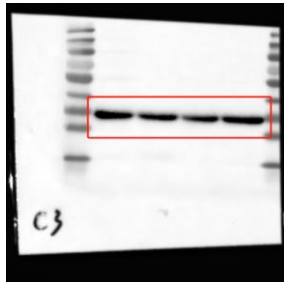

cleaved-Casp3:

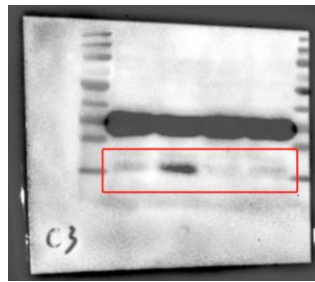

pro-GSDMD and cleaved-GSDMD:

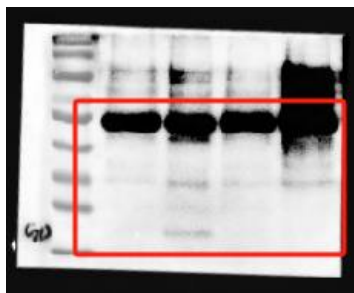

pro-GSDME and cleaved-GSDME:

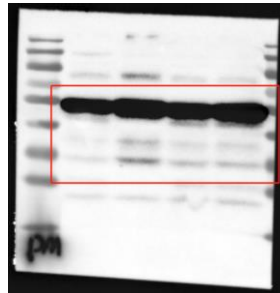

ZBP1:

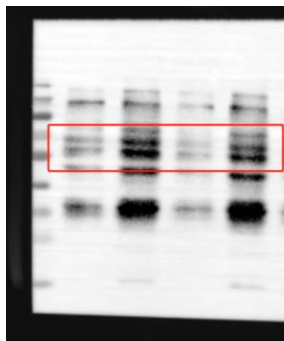

$\beta$ -actin(run on separate gels as sample processing controls):

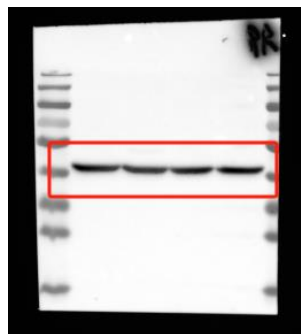

**Extended data | Figure3 c**

**IP for ZBP1**

IP ZBP1:

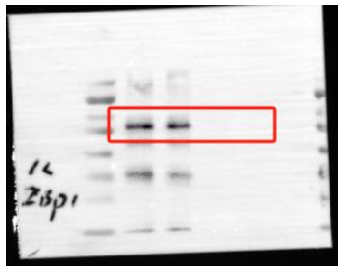

IP FADD:

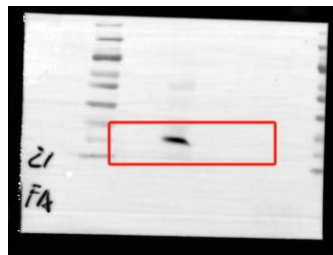

IP RIPK1:

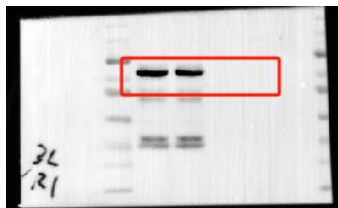

IP Casp8:

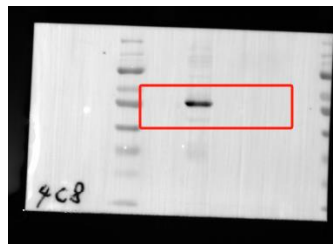

INPUT ZBP1:

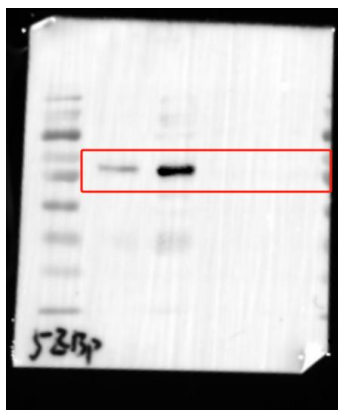

INPUT FADD:

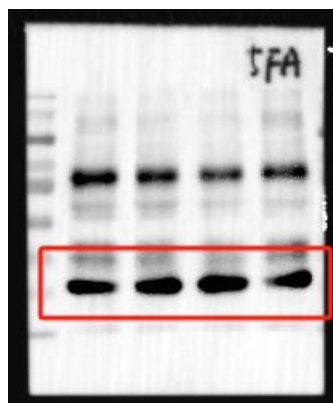

INPUT RIPK1:

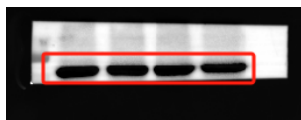

INPUT Casp8:

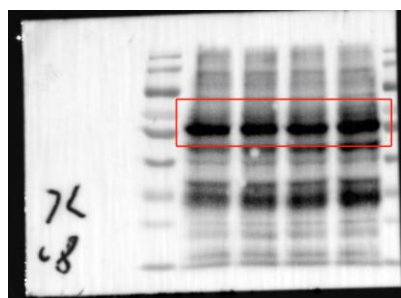

### IP for Casp8

IP ZBP1:

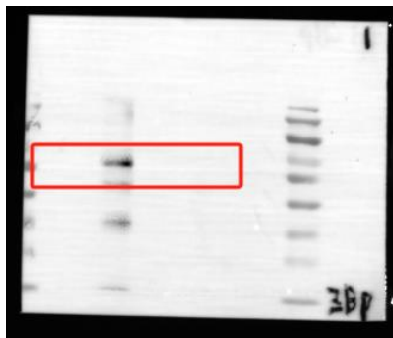

IP FADD:

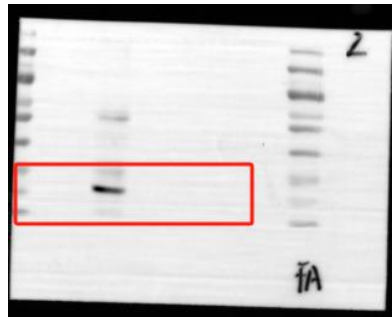

IP RIPK1:

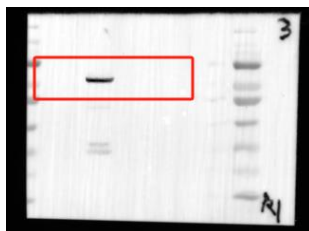

IP Casp8:

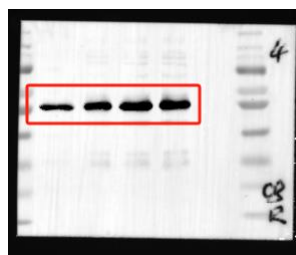

INPUT ZBP1:

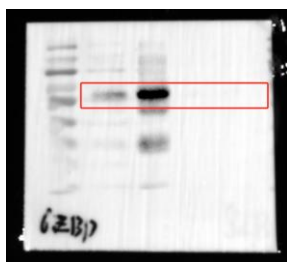

INPUT FADD:

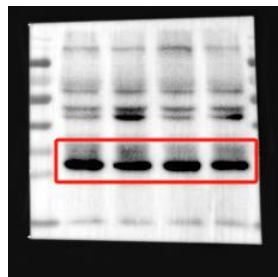

INPUT RIPK1:

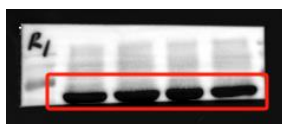

INPUT Casp8:

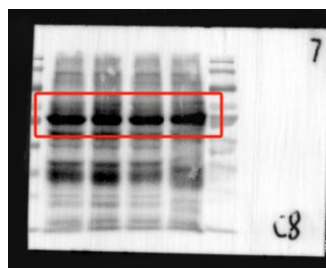

**Extended data | Figure4 c**

Casp8:

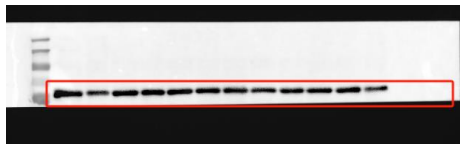

cleaved-Casp8:

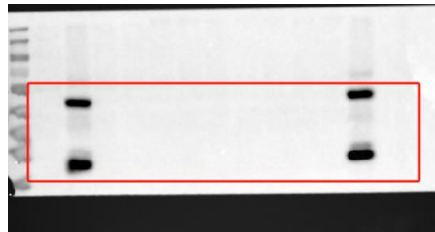

Casp3:

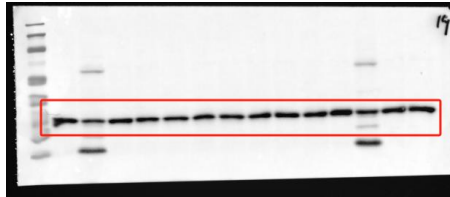

cleaved-Casp3:

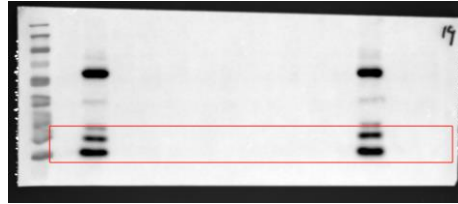

ZBP1:

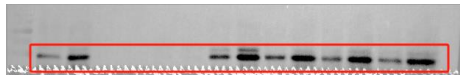

pro-GSDME and cleaved-GSDME:

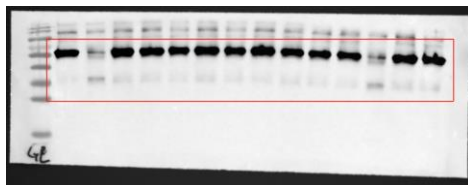

pro-GSDMD and cleaved-GSDMD:

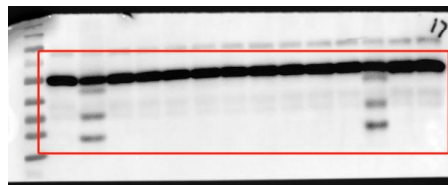

$\beta$ -actin(run on separate gels as sample processing controls):

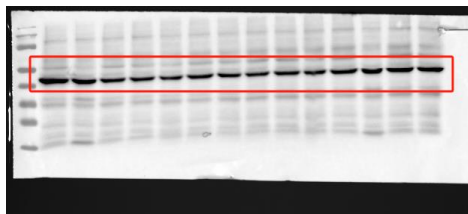

**Extended data | Figure4 f**

IP ZBP1:

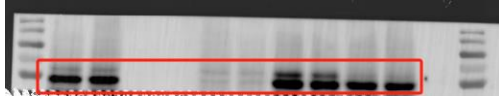

IP RIPK1:

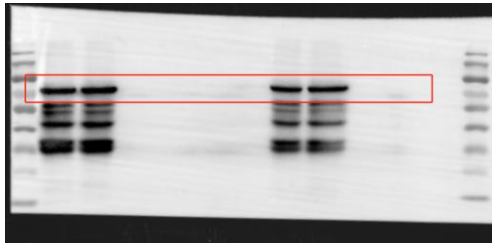

INPUT ZBP1:

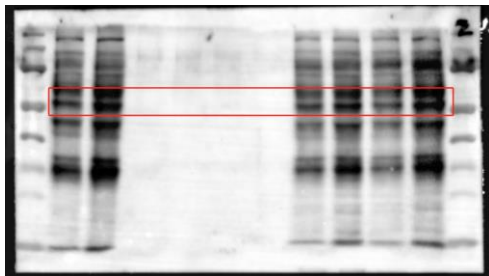

INPUT RIPK1:

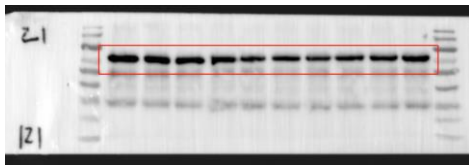

IP FADD:

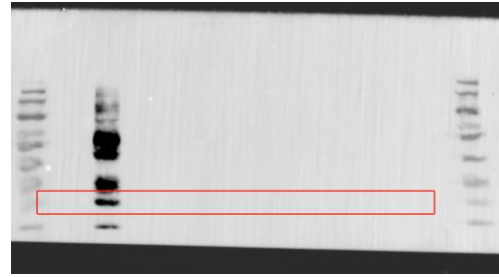

IP Casp8:

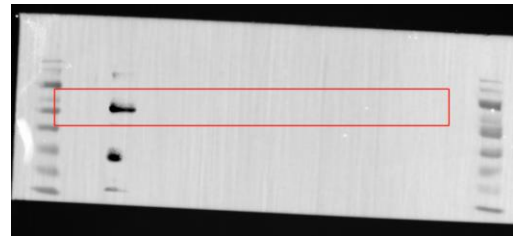

INPUT FADD:

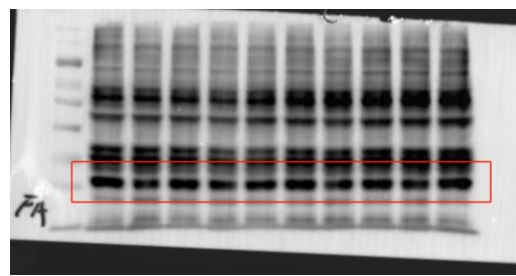

INPUT Casp8:

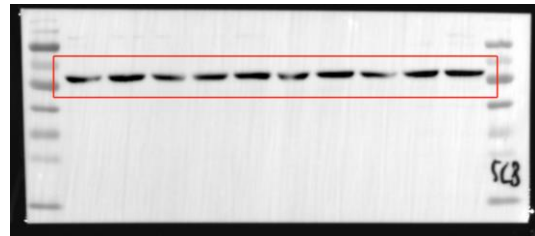

**Extended data | Figure5 b**

Casp8:

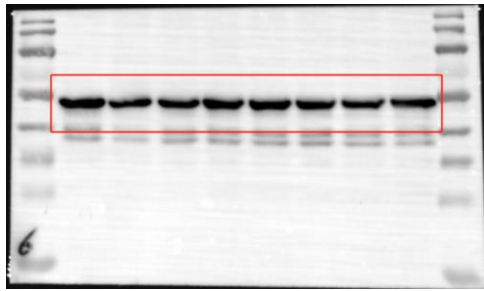

cleaved-Casp8:

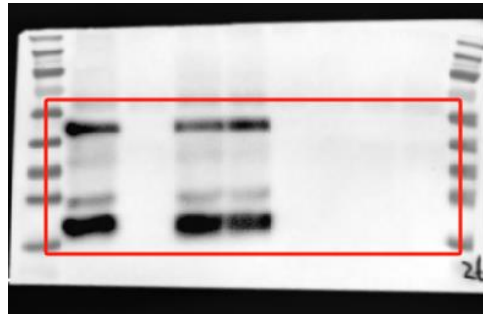

Casp3:

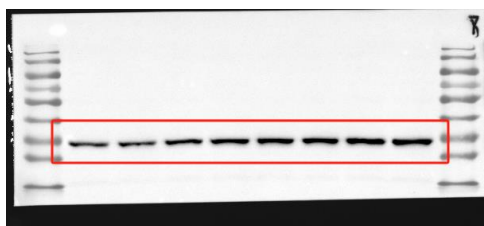

cleaved-Casp3:

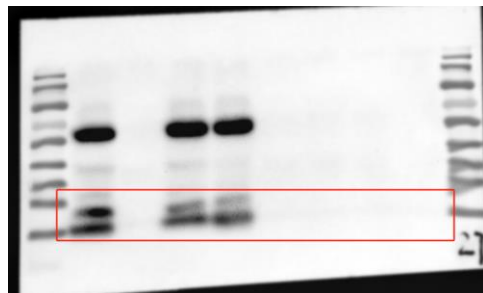

ZBP1:

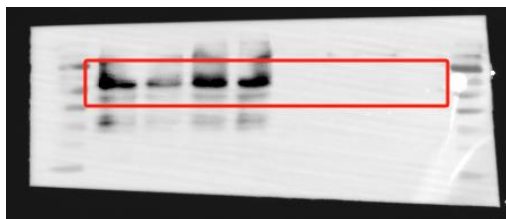

pro-GSDME and cleaved-GSDME:

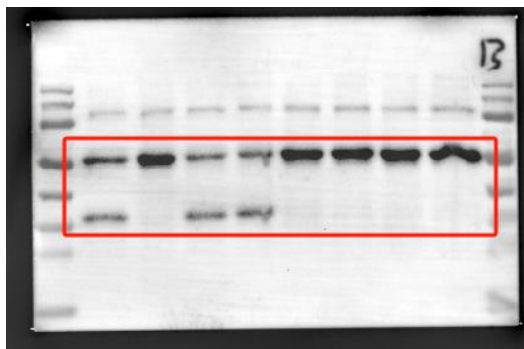

pro-GSDMD and cleaved-GSDMD:

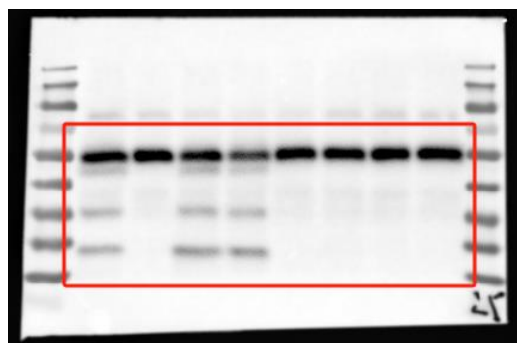

$\beta$ -actin(run on separate gels as sample processing controls):

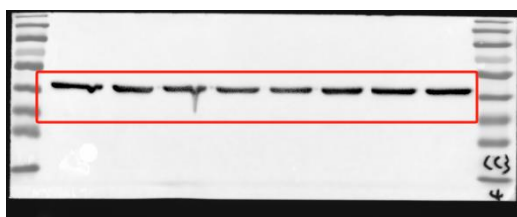

**Extended data | Figure5 f**

IP ZBP1:

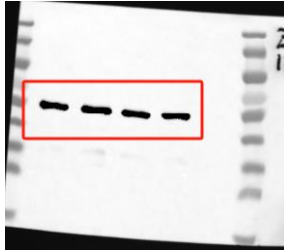

IP FADD:

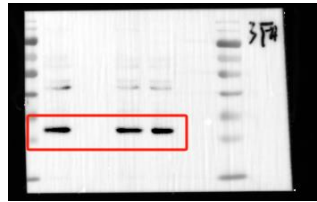

IP RIPK1:

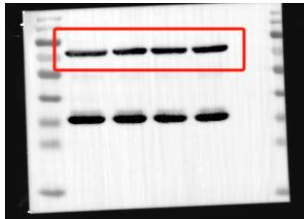

IP CASP8:

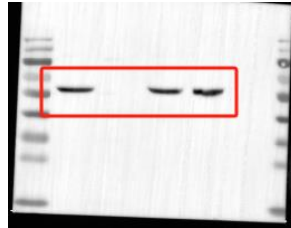

INPUT ZBP1:

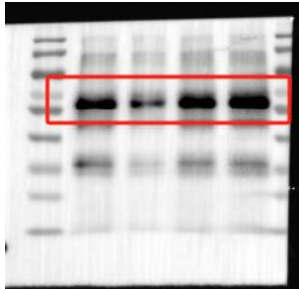

INPUT FADD:

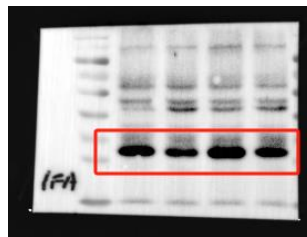

INPUT RIPK1:

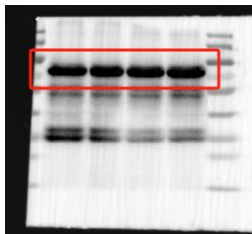

INPUT CASP8:

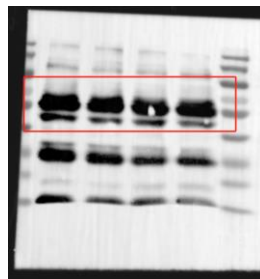

Supplement: Supplementary file 1 [file 4bf20b883d8c7dc94e9877d8.pdf]
